# Supplementary material for: Structural, electronic, and optical studies of BaRE2Ge3O10 (RE = Y, Sc, Gd–Lu) germanates with a special focus on the [Ge3O10]8− geometry
Source: Royal Society of Chemistry journal article supplement (doi:10.1039/c9ce01282f), 2019-01-01
Supplement: c9ce01282f1.pdf [file c9ce01282f1.pdf]

## Electronic Supplementary Information (ESI)

### Structural, electronic and optical studies of BaRE<sub>2</sub>Ge<sub>3</sub>O<sub>10</sub> (RE = Y, Sc, Gd–Lu) trigermanates with a special focus on the [Ge<sub>3</sub>O<sub>10</sub>]<sup>8-</sup> geometry

O. A. Lipina, L. L. Surat, A. Yu. Chufarov, A. P. Tyutyunnik, A. N. Enyashin,

I. V. Baklanova, K. G. Belova, Ya. V. Baklanova and V. G. Zubkov

Table S1. The results<sup>a</sup> of quantitative energy-dispersive X-ray analyses for BaRE<sub>2</sub>Ge<sub>3</sub>O<sub>10</sub> (RE = Y, Sc, Gd–Lu)

| Compound                                          | Mass. % of Ba |              | Mass.% of RE |              | Mass.% of Ge |              |
|---------------------------------------------------|---------------|--------------|--------------|--------------|--------------|--------------|
|                                                   | Calculated    | Experimental | Calculated   | Experimental | Calculated   | Experimental |
| BaY <sub>2</sub> Ge <sub>3</sub> O <sub>10</sub>  | 25.8          | 25.0±0.8     | 33.4         | 34.4±1.0     | 40.8         | 40.6±0.8     |
| BaSc <sub>2</sub> Ge <sub>3</sub> O <sub>10</sub> | 30.8          | 31.0±1.1     | 20.2         | 20.0±0.4     | 49.0         | 49.0±1.4     |
| BaGd <sub>2</sub> Ge <sub>3</sub> O <sub>10</sub> | 20.5          | 19.8±1.9     | 47.0         | 48.7±1.7     | 32.5         | 31.5±2.0     |
| BaTb <sub>2</sub> Ge <sub>3</sub> O <sub>10</sub> | 20.4          | 19.4±1.5     | 47.2         | 48.9±1.5     | 32.4         | 31.7±1.0     |
| BaDy <sub>2</sub> Ge <sub>3</sub> O <sub>10</sub> | 20.2          | 19.1±2.2     | 47.8         | 49.5±2.8     | 32.0         | 31.4±0.9     |
| BaHo <sub>2</sub> Ge <sub>3</sub> O <sub>10</sub> | 20.0          | 20.3±0.9     | 48.1         | 47.8±1.0     | 31.8         | 31.9±1.1     |
| BaEr <sub>2</sub> Ge <sub>3</sub> O <sub>10</sub> | 19.9          | 19.3±0.7     | 48.5         | 51.5±2.6     | 31.6         | 29.2±2.8     |
| BaTm <sub>2</sub> Ge <sub>3</sub> O <sub>10</sub> | 19.8          | 21.1±1.9     | 48.8         | 49.2±2.5     | 31.4         | 29.7±2.6     |
| BaYb <sub>2</sub> Ge <sub>3</sub> O <sub>10</sub> | 19.6          | 21.5±1.8     | 49.4         | 48.7±2.2     | 31.1         | 29.8±2.1     |
| BaLu <sub>2</sub> Ge <sub>3</sub> O <sub>10</sub> | 19.5          | 20.0±1.4     | 49.6         | 48.9±1.7     | 30.9         | 31.1±1.4     |

<sup>a</sup> Random errors of direct measurements shown in the table were determined according to the formulas:

$$\Delta a_r = t_{St} \cdot S(\bar{a})$$

and

$$S(\bar{a}) = \sqrt{\frac{\sum_{i=1}^n (a_i - \bar{a})^2}{n \cdot (n - 1)}}$$

where  $\bar{a}$  is an arithmetic mean value of all measurement results,

$n = 5$  is amount of measurements,

$t_{St} = 2.776$  is the Student's coefficient ( $n = 5$  and  $\alpha = 0.95$ ).

Table S2. Atomic coordinates and thermal parameters ( $U_{\text{iso}} \times 100, \text{\AA}^2$ ) for  $\text{BaRE}_2\text{Ge}_3\text{O}_{10}$  ( $RE = \text{Y, Gd-Ho}$ )

|       |    |                             | Gd          | Tb                    | Dy          | Ho         | Y          |
|-------|----|-----------------------------|-------------|-----------------------|-------------|------------|------------|
| Ba    | 2e | x                           | 0.7675(4)   | 0.7689(4)             | 0.7666(3)   | 0.7655(1)  | 0.7652(1)  |
|       |    | y                           | 0.25        | 0.25                  | 0.25        | 0.25       | 0.25       |
|       |    | z                           | 0.0117(3)   | 0.0127(3)             | 0.0130(2)   | 0.0138(1)  | 0.0135(1)  |
|       |    | $U_{\text{iso}} \times 100$ | 3.09        | 2.46(9)               | 2.49        | 1.76       | 2.62       |
| RE    | 4f | x                           | 0.1593(4)   | 0.1551(3)             | 0.1545(2)   | 0.1531(1)  | 0.1531(1)  |
|       |    | y                           | 0.0991(1)   | 0.1000(1)             | 0.10018(7)  | 0.10083(5) | 0.10088(5) |
|       |    | z                           | 0.6795(2)   | 0.6783(2)             | 0.6766(1)   | 0.67621(9) | 0.67599(9) |
|       |    | $U_{\text{iso}} \times 100$ | 2.48        | 2.38(7)               | 2.36        | 2.03       | 2.30       |
| Ge(1) | 2e | x                           | 0.5862(9)   | 0.5849(8)             | 0.5829(5)   | 0.5799(3)  | 0.5808(2)  |
|       |    | y                           | 0.25        | 0.25                  | 0.25        | 0.25       | 0.25       |
|       |    | z                           | 0.4760(7)   | 0.4733(6)             | 0.4759(4)   | 0.4759(2)  | 0.4763(2)  |
|       |    | $U_{\text{iso}} \times 100$ | 2.70        | 2.06(13)              | 2.13        | 1.61       | 2.36       |
| Ge(2) | 4f | x                           | 0.3026(6)   | 0.3038(5)             | 0.3059(4)   | 0.3046(2)  | 0.3040(2)  |
|       |    | y                           | 0.0548(2)   | 0.0531(2)             | 0.0534(1)   | 0.05289(7) | 0.05294(6) |
|       |    | z                           | 0.2019(4)   | 0.2012(4)             | 0.2014(3)   | 0.2020(1)  | 0.2012(1)  |
|       |    | $U_{\text{iso}} \times 100$ | 2.78        | 2.27(11)              | 2.57        | 1.62       | 2.44       |
| O(1)  | 2e | x                           | 0.361(3)    | 0.3503(31)            | 0.3468(19)  | 0.3414(12) | 0.3428(10) |
|       |    | y                           | 0.25        | 0.250000              | 0.25        | 0.25       | 0.25       |
|       |    | z                           | 0.6003(21)  | 0.6038(23)            | 0.5975(13)  | 0.5923(8)  | 0.5919(7)  |
|       |    | $U_{\text{iso}} \times 100$ | 2.2(7)      | 2.71(20) <sup>a</sup> | 0.59(33)    | 1.49(20)   | 2.49(16)   |
| O(2)  | 2e | x                           | 0.895(4)    | 0.9035(39)            | 0.8838(25)  | 0.8804(13) | 0.8797(10) |
|       |    | y                           | 0.25        | 0.250000              | 0.25        | 0.25       | 0.25       |
|       |    | z                           | 0.6402(27)  | 0.6510(27)            | 0.6466(17)  | 0.6394(9)  | 0.6409(8)  |
|       |    | $U_{\text{iso}} \times 100$ | 3.1(8)      | 2.71(20) <sup>a</sup> | 2.43(45)    | 1.19(21)   | 1.42(16)   |
| O(3)  | 4f | x                           | 0.5740(23)  | 0.5683(22)            | 0.5840(13)  | 0.5722(8)  | 0.5673(7)  |
|       |    | y                           | 0.1385(10)  | 0.1364(9)             | 0.1366(6)   | 0.1382(3)  | 0.1380(3)  |
|       |    | z                           | 0.3152(18)  | 0.3216(18)            | 0.3145(11)  | 0.3166(6)  | 0.3160(6)  |
|       |    | $U_{\text{iso}} \times 100$ | 2.8(5)      | 2.71(20) <sup>a</sup> | 2.27(26)    | 1.83(14)   | 2.52(11)   |
| O(4)  | 4f | x                           | 0.4303(21)  | 0.4276(21)            | 0.4348(13)  | 0.4411(8)  | 0.4437(7)  |
|       |    | y                           | -0.0715(11) | -0.0692(10)           | -0.0731(6)  | -0.0695(3) | -0.0698(3) |
|       |    | z                           | 0.1713(20)  | 0.1761(18)            | 0.1763(11)  | 0.1775(6)  | 0.1809(6)  |
|       |    | $U_{\text{iso}} \times 100$ | 2.9(5)      | 2.71(20) <sup>a</sup> | 1.98(30)    | 2.03(16)   | 2.59(12)   |
| O(5)  | 4f | x                           | 0.1308(20)  | 0.1610(21)            | 0.1323(14)  | 0.1312(8)  | 0.1335(7)  |
|       |    | y                           | 0.1225(10)  | 0.1267(10)            | 0.1211(7)   | 0.1186(3)  | 0.1193(3)  |
|       |    | z                           | -0.0187(19) | -0.0091(19)           | -0.0160(11) | -0.0134(6) | -0.0160(6) |
|       |    | $U_{\text{iso}} \times 100$ | 1.2(4)      | 2.71(20) <sup>a</sup> | 2.08(27)    | 1.16(13)   | 2.35(11)   |
| O(6)  | 4f | x                           | 0.1115(24)  | 0.0974(24)            | 0.1164(15)  | 0.1142(9)  | 0.1168(8)  |
|       |    | y                           | 0.0450(10)  | 0.0471(10)            | 0.0428(6)   | 0.0428(3)  | 0.0407(3)  |
|       |    | z                           | 0.3651(17)  | 0.3652(18)            | 0.3662(11)  | 0.3616(6)  | 0.3605(6)  |
|       |    | $U_{\text{iso}} \times 100$ | 1.8(4)      | 2.71(20) <sup>a</sup> | 1.43(26)    | 1.44(14)   | 2.36(11)   |

<sup>a</sup> The thermal vibration parameters of oxygen atoms have been constrained as a single variable.

**Table S3.** Atomic coordinates and thermal parameters ( $U_{\text{iso}} \times 100, \text{\AA}^2$ ) for  $\text{BaRE}_2\text{Ge}_3\text{O}_{10}$  ( $RE = \text{Sc, Er-Lu}$ )

|       |    |                             | Er         | Tm         | Yb         | Lu          | Sc         |
|-------|----|-----------------------------|------------|------------|------------|-------------|------------|
| Ba    | 2e | x                           | 0.7649(2)  | 0.7671(2)  | 0.7664(1)  | 0.7656(3)   | 0.7744(1)  |
|       |    | y                           | 0.25       | 0.25       | 0.25       | 0.25        | 0.25       |
|       |    | z                           | 0.0148(1)  | 0.0161(1)  | 0.0169(1)  | 0.0173(2)   | 0.0304(1)  |
|       |    | $U_{\text{iso}} \times 100$ | 1.90       | 2.53       | 2.92       | 2.49        | 2.48       |
| RE    | 4f | x                           | 0.1514(1)  | 0.1502(1)  | 0.14936(9) | 0.1477(2)   | 0.1420(3)  |
|       |    | y                           | 0.10127(5) | 0.10157(4) | 0.10185(3) | 0.10212(7)  | 0.1039(1)  |
|       |    | z                           | 0.67552(9) | 0.67465(8) | 0.67390(7) | 0.6733(1)   | 0.6684(3)  |
|       |    | $U_{\text{iso}} \times 100$ | 1.79       | 2.37       | 2.70       | 2.16        | 2.17       |
| Ge(1) | 2e | x                           | 0.5789(3)  | 0.5781(3)  | 0.5771(3)  | 0.5757(5)   | 0.5658(3)  |
|       |    | y                           | 0.25       | 0.25       | 0.25       | 0.25        | 0.25       |
|       |    | z                           | 0.4759(2)  | 0.4759(2)  | 0.4762(2)  | 0.4764(4)   | 0.4799(3)  |
|       |    | $U_{\text{iso}} \times 100$ | 1.69       | 2.29       | 2.61       | 2.09        | 2.18       |
| Ge(2) | 4f | x                           | 0.3037(2)  | 0.3045(2)  | 0.3037(2)  | 0.3041(4)   | 0.3009(2)  |
|       |    | y                           | 0.05200(9) | 0.05142(8) | 0.05090(7) | 0.0504(2)   | 0.04452(7) |
|       |    | z                           | 0.2013(2)  | 0.2007(2)  | 0.2008(1)  | 0.2011(3)   | 0.1999(2)  |
|       |    | $U_{\text{iso}} \times 100$ | 1.78       | 2.37       | 2.73       | 2.36        | 2.26       |
| O(1)  | 2e | x                           | 0.3380(15) | 0.3328(14) | 0.3337(11) | 0.3333(24)  | 0.3029(12) |
|       |    | y                           | 0.25       | 0.25       | 0.25       | 0.25        | 0.25       |
|       |    | z                           | 0.5928(10) | 0.5904(9)  | 0.5878(8)  | 0.5911(16)  | 0.5715(10) |
|       |    | $U_{\text{iso}} \times 100$ | 1.69(25)   | 2.01(23)   | 2.47(20)   | 1.66(40)    | 2.22(20)   |
| O(2)  | 2e | x                           | 0.8877(17) | 0.8827(16) | 0.8808(11) | 0.8831(28)  | 0.8793(12) |
|       |    | y                           | 0.25       | 0.25       | 0.25       | 0.25        | 0.25       |
|       |    | z                           | 0.6487(12) | 0.6456(11) | 0.6471(8)  | 0.6450(21)  | 0.6486(10) |
|       |    | $U_{\text{iso}} \times 100$ | 1.59(26)   | 1.63(23)   | 1.36(18)   | 2.43(45)    | 1.82(19)   |
| O(3)  | 4f | x                           | 0.5715(10) | 0.5679(9)  | 0.5689(8)  | 0.5714(18)  | 0.5593(8)  |
|       |    | y                           | 0.1386(4)  | 0.1371(4)  | 0.1387(3)  | 0.1414(8)   | 0.1371(4)  |
|       |    | z                           | 0.3160(8)  | 0.3163(7)  | 0.3182(6)  | 0.3166(13)  | 0.3115(7)  |
|       |    | $U_{\text{iso}} \times 100$ | 1.83(17)   | 2.18(16)   | 2.64(14)   | 2.89(31)    | 2.08(15)   |
| O(4)  | 4f | x                           | 0.4487(10) | 0.4477(10) | 0.4541(8)  | 0.4559(19)  | 0.4702(10) |
|       |    | y                           | -0.0704(4) | -0.0716(4) | -0.0709(3) | -0.0710(7)  | -0.0774(3) |
|       |    | z                           | 0.1839(8)  | 0.1836(8)  | 0.1822(6)  | 0.1848(15)  | 0.1960(8)  |
|       |    | $U_{\text{iso}} \times 100$ | 1.58(18)   | 2.23(18)   | 2.58(15)   | 3.24(34)    | 2.14(15)   |
| O(5)  | 4f | x                           | 0.1319(11) | 0.1371(10) | 0.1311(8)  | 0.1327(16)  | 0.1184(8)  |
|       |    | y                           | 0.1167(5)  | 0.1182(4)  | 0.1149(4)  | 0.1151(8)   | 0.1084(4)  |
|       |    | z                           | -0.0185(8) | -0.0198(7) | -0.0219(6) | -0.0208(13) | -0.0305(8) |
|       |    | $U_{\text{iso}} \times 100$ | 1.81(17)   | 1.69(15)   | 2.82(13)   | 1.89(27)    | 2.09(15)   |
| O(6)  | 4f | x                           | 0.1206(11) | 0.1153(10) | 0.1166(8)  | 0.1170(18)  | 0.1067(9)  |
|       |    | y                           | 0.0412(4)  | 0.0382(4)  | 0.0401(3)  | 0.0380(7)   | 0.0360(4)  |
|       |    | z                           | 0.3652(8)  | 0.3605(8)  | 0.3652(6)  | 0.3637(12)  | 0.3684(8)  |
|       |    | $U_{\text{iso}} \times 100$ | 1.03(17)   | 1.96(16)   | 2.29(14)   | 1.21(28)    | 2.43(14)   |

Table S4. Anisotropic thermal parameters<sup>a</sup> ( $U \times 100, \text{\AA}^2$ ) of metal atoms for  $\text{BaRE}_2\text{Ge}_3\text{O}_{10}$

|       |                     | Gd        | Tb         | Dy         | Ho        | Y          |
|-------|---------------------|-----------|------------|------------|-----------|------------|
| Ba    | $U_{11} \times 100$ | 2.87(28)  | 1.55(22)   | 2.67(14)   | 1.96(6)   | 2.58(5)    |
|       | $U_{22} \times 100$ | 2.64(28)  | 2.14(22)   | 2.30(12)   | 1.67(5)   | 2.72(4)    |
|       | $U_{33} \times 100$ | 3.62(27)  | 3.55(22)   | 2.50(12)   | 1.68(5)   | 2.53(4)    |
|       | $U_{12} \times 100$ | 0         | 0          | 0          | 0         | 0          |
|       | $U_{13} \times 100$ | 1.03(16)  | 0.69(15)   | 0.86(9)    | 0.62(4)   | 0.85(4)    |
|       | $U_{23} \times 100$ | 0         | 0          | 0          | 0         | 0          |
| RE    | $U_{11} \times 100$ | 2.66(21)  | 2.36(14)   | 2.37(8)    | 1.91(5)   | 2.41(4)    |
|       | $U_{22} \times 100$ | 2.47(20)  | 2.48(12)   | 2.50(7)    | 2.11(4)   | 2.41(4)    |
|       | $U_{33} \times 100$ | 2.33(21)  | 3.13(14)   | 2.25(7)    | 2.06(4)   | 2.15(4)    |
|       | $U_{12} \times 100$ | -0.36(11) | 0.15(11)   | -0.12(7)   | -0.09(4)  | -0.16(4)   |
|       | $U_{13} \times 100$ | 0.86(10)  | 1.25(10)   | 0.85(6)    | 0.71(4)   | 0.853(34)  |
|       | $U_{23} \times 100$ | -0.25(10) | 0.26(10)   | -0.07(6)   | -0.04(4)  | -0.051(33) |
| Ge(1) | $U_{11} \times 100$ | 1.50(39)  | 1.16(36)   | 1.28(21)   | 1.30(10)  | 2.26(8)    |
|       | $U_{22} \times 100$ | 3.13(39)  | 2.31(33)   | 2.16(20)   | 1.68(10)  | 2.18(8)    |
|       | $U_{33} \times 100$ | 3.13(37)  | 2.82(34)   | 2.76(20)   | 1.76(10)  | 2.57(8)    |
|       | $U_{12} \times 100$ | 0         | 0          | 0          | 0         | 0          |
|       | $U_{13} \times 100$ | 0.53(28)  | 0.19(27)   | 0.67(17)   | 0.46(8)   | 0.80(6)    |
|       | $U_{23} \times 100$ | 0         | 0          | 0          | 0         | 0          |
| Ge(2) | $U_{11} \times 100$ | 2.55(32)  | 2.03(27)   | 2.89(17)   | 1.60(8)   | 2.42(6)    |
|       | $U_{22} \times 100$ | 2.84(27)  | 2.68(21)   | 2.29(13)   | 1.81(6)   | 2.49(5)    |
|       | $U_{33} \times 100$ | 2.84(30)  | 2.57(25)   | 2.56(15)   | 1.42(7)   | 2.36(5)    |
|       | $U_{12} \times 100$ | -0.40(19) | -0.34(17)  | -0.04(11)  | -0.02(6)  | -0.03(5)   |
|       | $U_{13} \times 100$ | 0.83(20)  | 0.94(20)   | 0.94(13)   | 0.47(6)   | 0.75(5)    |
|       | $U_{23} \times 100$ | -0.06(18) | -0.13(17)  | 0.13(11)   | -0.07(6)  | -0.01(5)   |
|       |                     | Er        | Tm         | Yb         | Lu        | Sc         |
| Ba    | $U_{11} \times 100$ | 1.92(8)   | 2.52(8)    | 3.05(6)    | 2.68(13)  | 2.63(8)    |
|       | $U_{22} \times 100$ | 1.89(8)   | 2.78(7)    | 2.90(6)    | 2.54(13)  | 2.50(8)    |
|       | $U_{33} \times 100$ | 1.90(7)   | 2.40(7)    | 2.90(6)    | 2.41(12)  | 2.41(8)    |
|       | $U_{12} \times 100$ | 0         | 0          | 0          | 0         | 0          |
|       | $U_{13} \times 100$ | 0.68(6)   | 1.05(5)    | 1.19(4)    | 1.10(9)   | 1.04(5)    |
|       | $U_{23} \times 100$ | 0         | 0          | 0          | 0         | 0          |
| RE    | $U_{11} \times 100$ | 1.85(5)   | 2.44(4)    | 2.721(29)  | 2.26(7)   | 2.44(12)   |
|       | $U_{22} \times 100$ | 1.74(5)   | 2.42(4)    | 2.627(27)  | 2.15(7)   | 2.00(11)   |
|       | $U_{33} \times 100$ | 1.75(5)   | 2.20(4)    | 2.720(28)  | 2.03(6)   | 1.99(12)   |
|       | $U_{12} \times 100$ | -0.33(4)  | -0.245(34) | -0.103(27) | -0.08(6)  | -0.46(8)   |
|       | $U_{13} \times 100$ | 0.57(4)   | 0.724(33)  | 0.926(21)  | 0.69(5)   | 0.63(9)    |
|       | $U_{23} \times 100$ | -0.11(4)  | -0.070(32) | -0.101(25) | -0.05(5)  | 0.07(8)    |
| Ge(1) | $U_{11} \times 100$ | 1.67(12)  | 2.02(11)   | 2.70(9)    | 1.90(19)  | 2.09(11)   |
|       | $U_{22} \times 100$ | 1.90(12)  | 2.79(12)   | 2.47(9)    | 2.40(19)  | 1.92(11)   |
|       | $U_{33} \times 100$ | 1.43(12)  | 1.93(11)   | 2.70(9)    | 1.83(19)  | 2.41(11)   |
|       | $U_{12} \times 100$ | 0         | 0          | 0          | 0         | 0          |
|       | $U_{13} \times 100$ | 0.43(9)   | 0.50(8)    | 1.03(7)    | 0.46(15)  | 0.73(8)    |
|       | $U_{23} \times 100$ | 0         | 0          | 0          | 0         | 0          |
| Ge(2) | $U_{11} \times 100$ | 1.78(10)  | 2.18(9)    | 2.50(7)    | 2.08(15)  | 2.20(9)    |
|       | $U_{22} \times 100$ | 1.63(8)   | 2.31(8)    | 2.44(6)    | 2.03(13)  | 2.28(8)    |
|       | $U_{33} \times 100$ | 1.76(9)   | 2.46(9)    | 2.92(7)    | 2.73(15)  | 2.25(9)    |
|       | $U_{12} \times 100$ | -0.17(7)  | 0.02(6)    | -0.07(5)   | -0.26(11) | 0.14(6)    |
|       | $U_{13} \times 100$ | 0.38(8)   | 0.64(7)    | 0.51(6)    | 0.63(12)  | 0.78(6)    |
|       | $U_{23} \times 100$ | -0.22(6)  | 0.06(6)    | -0.19(5)   | -0.37(10) | 0.01(6)    |

<sup>a</sup> Anisotropic thermal factors are defined by  $T = e [-2\pi^2(u_1h^2a^{*2} + \dots + 2u_{12}hka^*b^* + \dots)]$

Table S5. The bond–valence sums (BVS) for the cations and oxygen anions, and global instability indexes (*GII*) for BaRE<sub>2</sub>Ge<sub>3</sub>O<sub>10</sub> (*RE* = Y, Sc, Gd–Lu)

| Atom       | Assumed oxidation state | Gd    |        | Tb    |        | Dy    |        | Ho    |        | Y     |        |
|------------|-------------------------|-------|--------|-------|--------|-------|--------|-------|--------|-------|--------|
|            |                         | BVS   | % dev. |
| Ba         | +2                      | 2.079 | 4      | 1.861 | 7      | 2.155 | 8      | 1.986 | 1      | 1.952 | 2      |
| RE         | +3                      | 2.977 | 1      | 3.135 | 4      | 2.889 | 4      | 3.087 | 3      | 3.010 | 0      |
| Ge(1)      | +4                      | 3.743 | 6      | 3.537 | 12     | 3.618 | 10     | 3.921 | 2      | 3.926 | 2      |
| Ge(2)      | +4                      | 3.516 | 12     | 3.784 | 5      | 3.600 | 10     | 3.909 | 2      | 3.927 | 2      |
| O(1)       | -2                      | 2.013 | 1      | 1.939 | 3      | 1.974 | 1      | 2.081 | 4      | 2.066 | 3      |
| O(2)       | -2                      | 1.869 | 7      | 1.863 | 7      | 1.919 | 4      | 2.020 | 1      | 2.010 | 0      |
| O(3)       | -2                      | 1.849 | 8      | 1.948 | 3      | 1.784 | 11     | 1.942 | 3      | 1.950 | 3      |
| O(4)       | -2                      | 1.838 | 8      | 1.962 | 2      | 1.852 | 7      | 1.971 | 1      | 1.930 | 4      |
| O(5)       | -2                      | 1.879 | 6      | 1.957 | 2      | 1.889 | 6      | 1.979 | 1      | 1.947 | 3      |
| O(6)       | -2                      | 1.897 | 5      | 1.85  | 7      | 1.904 | 5      | 2.007 | 0      | 2.011 | 1      |
| <i>GII</i> |                         | 0.20  |        | 0.19  |        | 0.21  |        | 0.06  |        | 0.05  |        |

  

| Atom       | Assumed oxidation state | Er    |        | Tm    |        | Yb    |        | Lu    |        | Sc    |        |
|------------|-------------------------|-------|--------|-------|--------|-------|--------|-------|--------|-------|--------|
|            |                         | BVS   | % dev. |
| Ba         | +2                      | 1.945 | 3      | 1.947 | 3      | 1.947 | 3      | 1.955 | 2      | 2.123 | 6      |
| RE         | +3                      | 2.974 | 1      | 2.884 | 4      | 2.956 | 1      | 3.053 | 2      | 2.808 | 6      |
| Ge(1)      | +4                      | 3.750 | 6      | 3.776 | 6      | 3.990 | 0      | 4.044 | 1      | 3.982 | 0      |
| Ge(2)      | +4                      | 3.844 | 4      | 3.901 | 2      | 3.811 | 5      | 3.811 | 5      | 3.864 | 3      |
| O(1)       | -2                      | 1.998 | 0      | 1.958 | 2      | 2.013 | 1      | 2.039 | 2      | 1.994 | 0      |
| O(2)       | -2                      | 1.899 | 5      | 1.925 | 4      | 1.944 | 3      | 1.976 | 1      | 1.937 | 3      |
| O(3)       | -2                      | 1.919 | 4      | 1.960 | 1      | 1.982 | 1      | 1.985 | 1      | 2.074 | 4      |
| O(4)       | -2                      | 1.912 | 4      | 1.894 | 5      | 1.902 | 5      | 1.934 | 3      | 1.902 | 5      |
| O(5)       | -2                      | 1.924 | 4      | 1.916 | 4      | 1.934 | 3      | 1.948 | 3      | 1.914 | 4      |
| O(6)       | -2                      | 1.962 | 2      | 1.935 | 3      | 1.939 | 3      | 1.989 | 1      | 1.869 | 7      |
| <i>GII</i> |                         | 0.11  |        | 0.10  |        | 0.08  |        | 0.07  |        | 0.11  |        |

Table S6. Theoretical lattice parameters, relative energies  $\Delta E$  and band gap BG for representative set of  $\text{BaY}_2\text{Ge}_3\text{O}_{10}$  and  $\text{BaLa}_2\text{Ge}_3\text{O}_{10}$  polymorphic modifications. DFT calculations.

| Compound                                | Lattice type                            | Lattice parameters in Å or °                                                      | $\Delta E$ , eV/st.unit | BG, eV |
|-----------------------------------------|-----------------------------------------|-----------------------------------------------------------------------------------|-------------------------|--------|
| $\text{BaY}_2\text{Ge}_3\text{O}_{10}$  | $\text{BaY}_2\text{Ge}_3\text{O}_{10}$  | $a = 5.64, b = 12.45, c = 7.01,$<br>$\beta = 104.9$                               | $\pm 0.0000$            | 3.4    |
|                                         | $\text{CaY}_2\text{Ge}_3\text{O}_{10}$  | $a = 7.00, b = 7.08, c = 19.23,$<br>$\alpha = 89.4, \beta = 104.2, \gamma = 88.7$ | +0.4232                 | 3.1    |
|                                         | $\text{CaLa}_2\text{Ge}_3\text{O}_{10}$ | $a = 7.05, b = 20.71, c = 7.14,$<br>$\beta = 114.6$                               | +0.5797                 | 3.2    |
|                                         | $\text{SrY}_2\text{Si}_3\text{O}_{10}$  | $a = 7.07, b = 7.15, c = 9.76,$<br>$\alpha = 71.0, \beta = 86.9, \gamma = 87.8$   | +0.0680                 | 3.5    |
| $\text{BaLa}_2\text{Ge}_3\text{O}_{10}$ | $\text{BaY}_2\text{Ge}_3\text{O}_{10}$  | $a = 5.81, b = 12.13, c = 7.27,$<br>$\beta = 104.5$                               | +0.6933                 | 3.0    |
|                                         | $\text{CaY}_2\text{Ge}_3\text{O}_{10}$  | $a = 7.19, b = 7.21, c = 19.47,$<br>$\alpha = 91.1, \beta = 106.0, \gamma = 90.5$ | +0.5762                 | 3.1    |
|                                         | $\text{CaLa}_2\text{Ge}_3\text{O}_{10}$ | $a = 7.02, b = 21.00, c = 7.26,$<br>$\beta = 115.9$                               | +0.5559                 | 3.2    |
|                                         | $\text{SrY}_2\text{Si}_3\text{O}_{10}$  | $a = 7.11, b = 7.11, c = 9.80,$<br>$\alpha = 71.6, \beta = 87.2, \gamma = 90.4$   | $\pm 0.0000$            | 3.1    |

Table S7. IR wavenumbers (cm<sup>-1</sup>) for the BaRE<sub>2</sub>Ge<sub>3</sub>O<sub>10</sub>

| Gd  | Tb  | Dy  | Y   | Ho  | Er  | Tm  | Yb  | Lu  | Sc  | Assignment                       |
|-----|-----|-----|-----|-----|-----|-----|-----|-----|-----|----------------------------------|
| 836 | 838 | 843 | 848 | 846 | 848 | 849 | 851 | 852 | 857 | v <sub>as</sub> Ge-O-Ge          |
| 805 | 810 | 808 | 812 | 812 | 814 | 816 | 819 | 822 | 823 | v <sub>s</sub> GeO <sub>3</sub>  |
|     | 776 | 780 | 782 | 782 | 783 | 786 | 785 | 791 |     |                                  |
|     | 743 | 747 | 752 | 751 | 753 | 755 | 758 | 757 | 768 | v <sub>as</sub> GeO <sub>3</sub> |
| 735 | 729 | 727 | 727 | 727 | 727 | 724 | 715 | 722 | 713 |                                  |
| 511 | 515 | 515 | 517 | 519 | 519 | 521 | 523 | 522 | 536 | v <sub>s</sub> Ge-O-Ge           |
|     |     |     |     |     |     |     | 488 | 492 | 488 |                                  |
| 466 | 467 | 471 | 462 | 477 | 482 | 480 | 475 | 475 | 469 | δ O-Ge-O                         |
| 437 | 439 |     |     | 443 | 444 |     | 449 | 450 | 447 |                                  |
|     |     |     |     | 414 | 415 | 418 | 420 | 426 |     |                                  |

Table S8. Raman wavenumbers (cm<sup>-1</sup>) for the BaRE<sub>2</sub>Ge<sub>3</sub>O<sub>10</sub>

| Tb  | Dy  | Y   | Tm  | Yb  | Lu  | Assignment                       |
|-----|-----|-----|-----|-----|-----|----------------------------------|
| 828 | 829 | 829 | 830 | 831 | 833 | v <sub>s</sub> GeO <sub>3</sub>  |
| 787 | 787 | 790 | 791 | 793 | 796 |                                  |
| 765 | 768 | 770 | 771 | 775 | 763 | v <sub>as</sub> GeO <sub>3</sub> |
| 742 | 743 | 757 | 750 | 761 | 754 |                                  |
| 505 | 505 | 506 | 509 | 511 | 512 | v <sub>s</sub> Ge-O-Ge           |
|     |     | 458 |     |     | 454 |                                  |
| 432 | 429 | 431 | 430 | 433 | 432 | δ O-Ge-O                         |
|     |     | 389 | 374 | 389 | 391 |                                  |
| 366 | 368 | 366 |     | 371 | 373 |                                  |

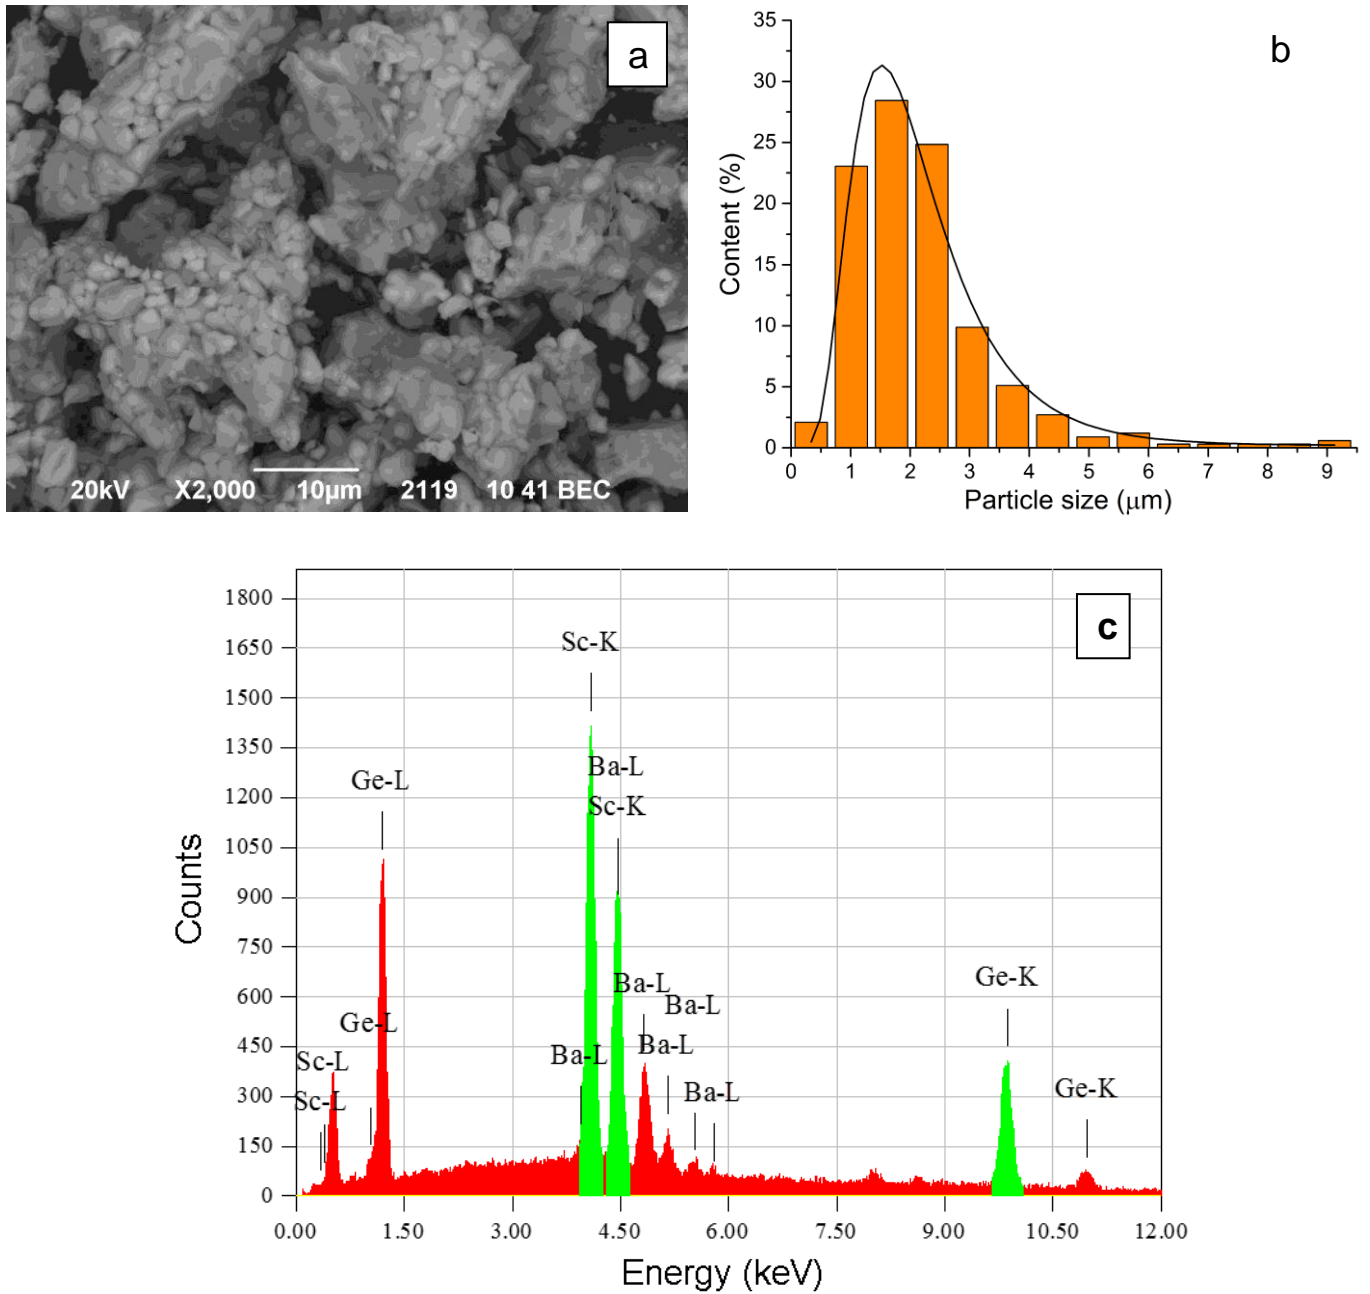

**Fig. S1** The typical SEM image of BaSc<sub>2</sub>Ge<sub>3</sub>O<sub>10</sub> powder (a), the particle size distribution histogram with a log-normal distribution fit (b) and the spectrum of BaSc<sub>2</sub>Ge<sub>3</sub>O<sub>10</sub> acquired at 20 kV (c).



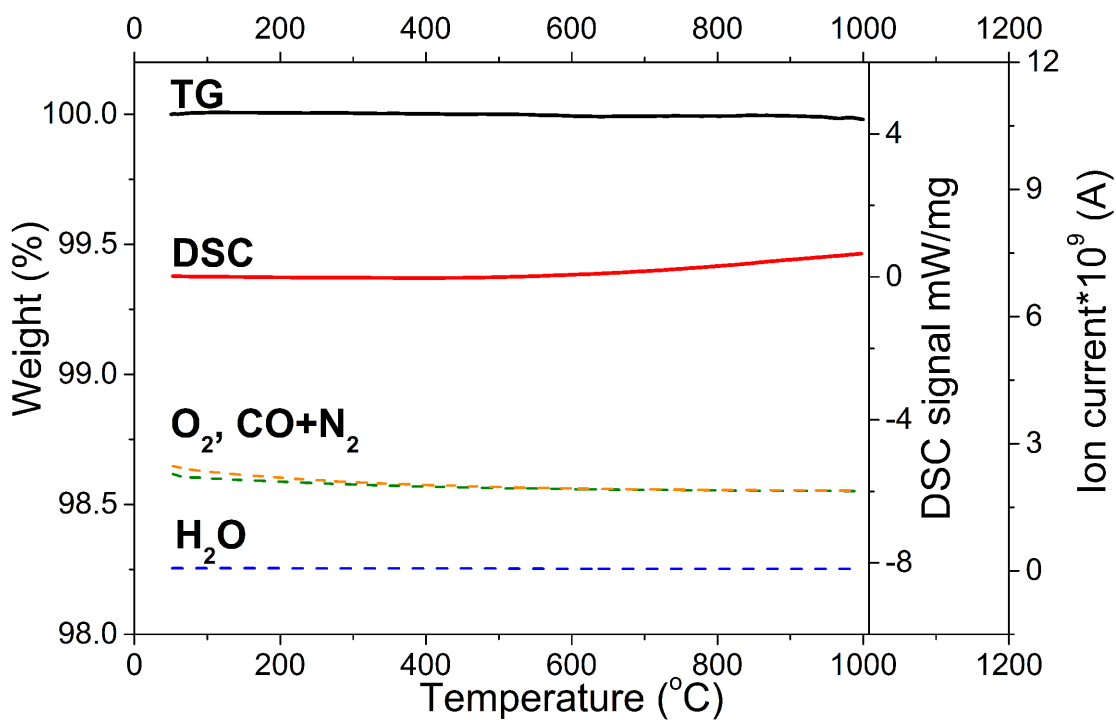

**Fig. S2** Simultaneous thermal analysis of the  $\text{BaYb}_2\text{Ge}_3\text{O}_{10}$ : solid lines - TG and DSC, dashed lines – ion currents of gases.

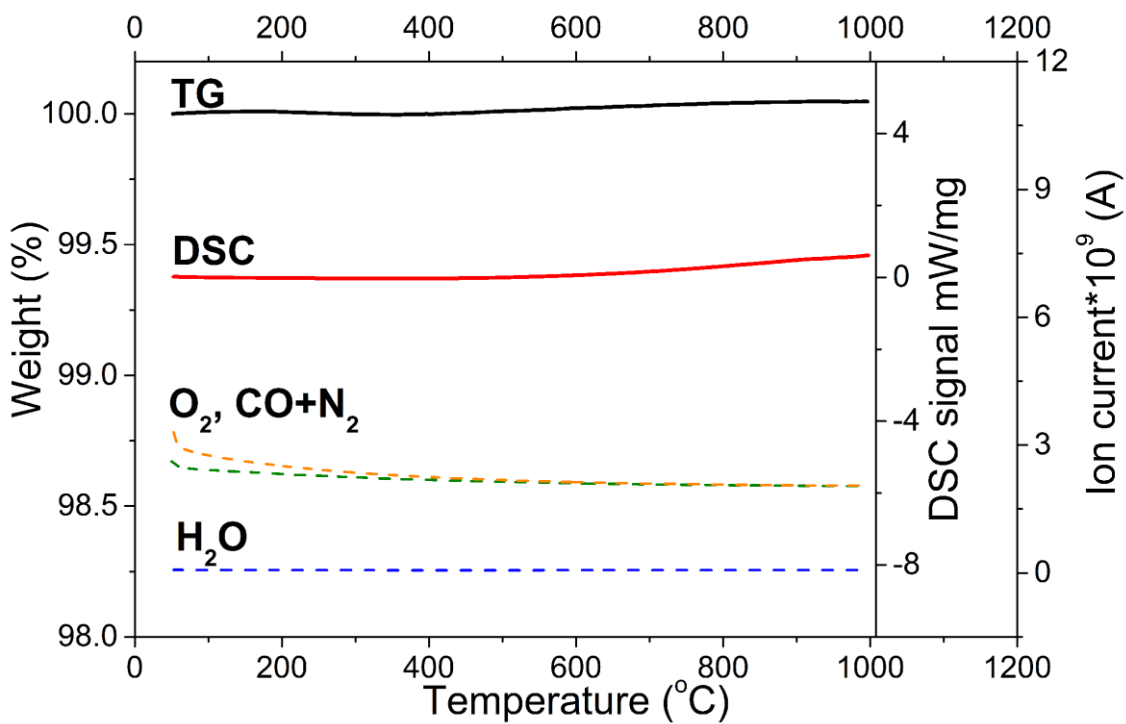

**Fig. S3** Simultaneous thermal analysis of the  $\text{BaY}_2\text{Ge}_3\text{O}_{10}$ : solid lines - TG and DSC, dashed lines – ion currents of gases.

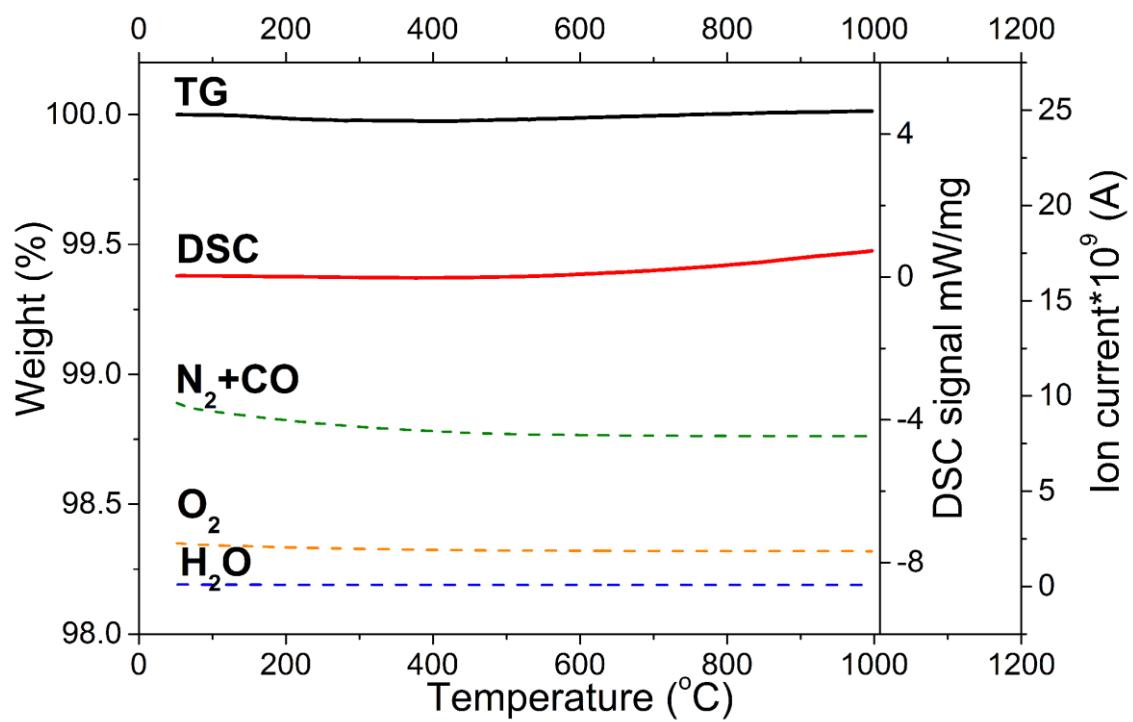

**Fig. S4** Simultaneous thermal analysis of the BaGd<sub>2</sub>Ge<sub>3</sub>O<sub>10</sub>: solid lines - TG and DSC, dashed lines – ion currents of gases.

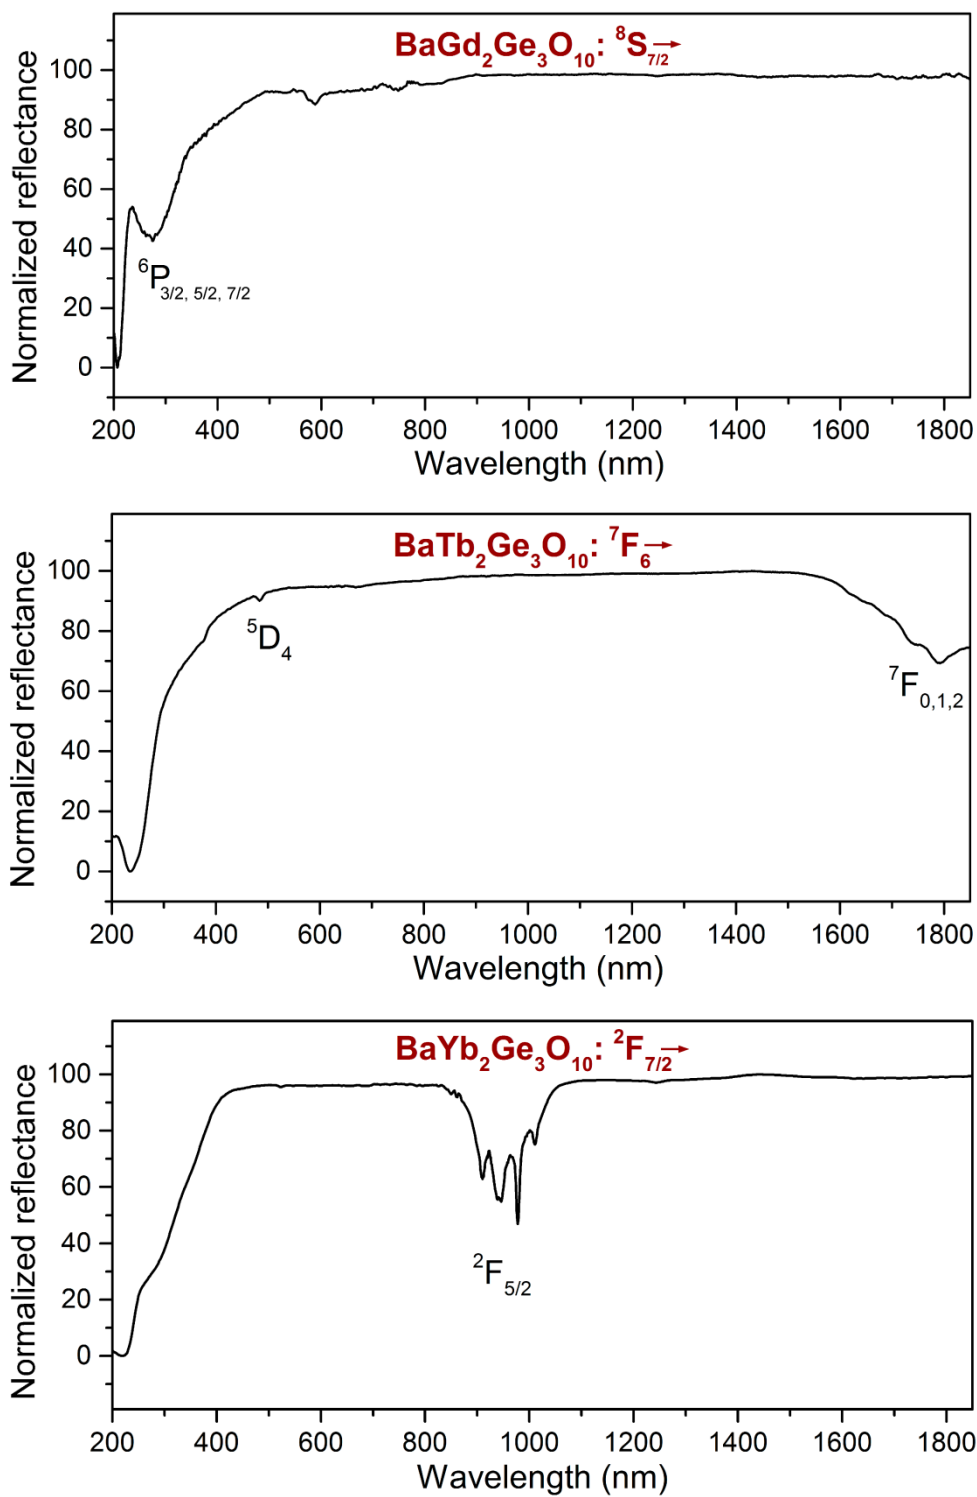

**Fig. S5** Diffuse reflectance spectra of BaRE<sub>2</sub>Ge<sub>3</sub>O<sub>10</sub> (RE = Gd, Tb, Yb)

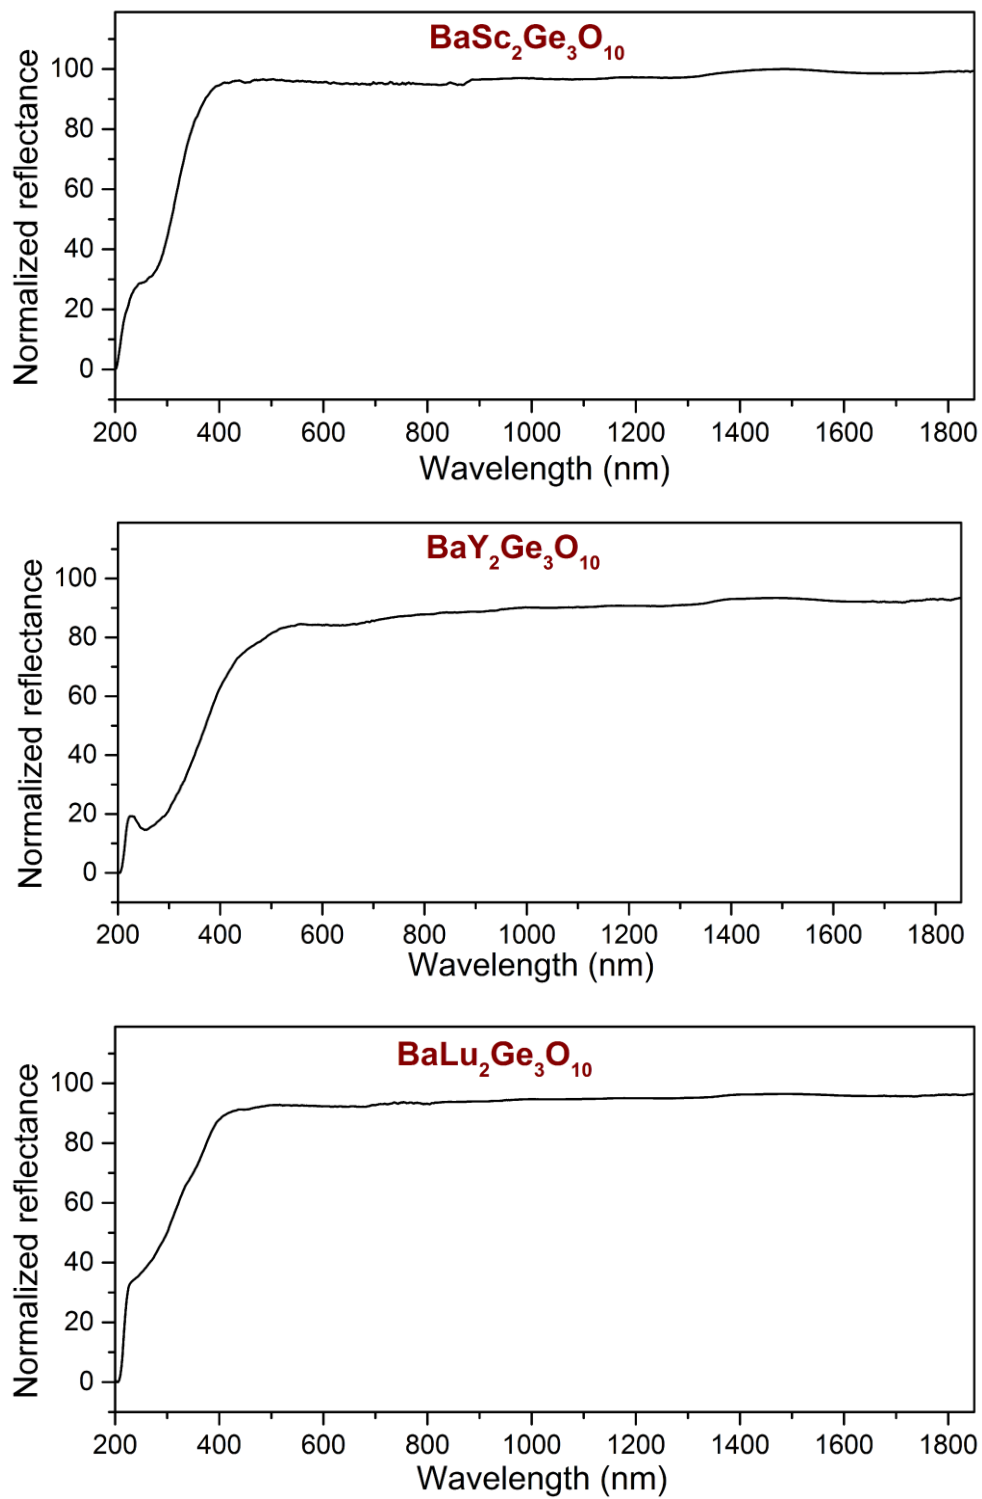

**Fig. S6** Diffuse reflectance spectra of  $\text{BaRE}_2\text{Ge}_3\text{O}_{10}$  ( $RE = \text{Y}, \text{Sc}, \text{Lu}$ )
